# Supplementary material for: Effectiveness of Need-Based Teacher’s Training Program to Enhance Online Teaching Quality
Source: Hindawi journal article supplement (doi:10.1155/2022/4118267), 2022-10-06
Supplement: f1 [file 4118267.f1.docx]

**Appendix**

**Appendix A.** Training Need-Analysis Questionnaire

| **No.** | **Questions** | **Options** |
| --- | --- | --- |
| 1 | Age? | <=25 / 26-35 / 36-45 / 46-55 / >=56 |
| 2 | Gender? | Male / Female |
| 3 | What is your current designation? | Headmaster / Assistant Headmaster / Senior Teacher / Assistant Teacher / Junior Teacher / Co-teacher/ Others |
| 4 | How long have you been in teaching? | (Input years) |
| 5 | Do you have any online teaching experience/training on distance teacher-learning before COVID-19? | Yes / No |
| 6 | Are you satisfied with the online teaching experience? | Yes / No |
| 7 | Please rate your online teaching satisfaction | Not at all / Slightly / Moderately / Highly |
| 8 | Do you feel confident while teaching online? | Yes / No |
| 9 | Please rate your confidence during online teaching | Not at all / Slightly / Moderately / Highly |
| 10 | What kind of challenges/barriers/problems do you face while teaching online? | Insufficient or unstable Internet connectivity / Less familiarity with online teaching tool / Technical problem / Heavy workload / Lack of skills/ Insufficient teaching materials/ Time management / Lack of suitable online environment at home / Lack of laptops or computers / Difficult to maintain discipline / Difficult to motivate students / Distractions / Others |

**Appendix B.** After-training Assessment Questionnaire

| **Type** | **Serial No.** | **Question** |
| --- | --- | --- |
| Strategies for managing online classrooms using digital platforms | Q1 | According to the speaker which one of the following ‘Class management Styles’ is expected to be followed during online teaching? |
| Q2 | Which one of the following is not discussed as a strategy to maintain classroom discipline? |
| Q3 | According to the discussion, which one of the following is not the objective of the ‘classroom management strategies’ during distance teaching-learning? |
| Online class activities and demonstration | Q1 | According to the speaker which one of the following is not discussed as components or strategies of ‘Effective Online Class Activities’? |
| Q2 | According to the speaker which one of the following is the objective of ‘Effective Online Teaching Activities’? |
| Q3 | What is to be done in the ‘Warm Up session’ in a virtual classroom? |

**Appendix C.** Semi-structured Interview Questionnaire

| **Serial No.** | **Semi-structured Interview Questionnaire** |
| --- | --- |
| 01 | What hardships have you been experiencing while teaching online before the Teachers’ Training Program? |
| 02 | Do you face any significant difference between pre-training and post-training experiences (e.g., confidence, motivation, skills, time management, discipline)? |
| 03 | Tell me about your overall perception regarding the Teachers’ Training Program. |
| 04 | How Teachers’ Training Program impact your online teaching quality? |

**Appendix D.** Expert opinion about the questionnaire and observation scale

| **No.** | **Dimentions** | **How do you rate (out of 5) the questionnaire and observation scale of the study?** |
| --- | --- | --- |
| 1 | Relevance, | 🞎 1 🞎 2 🞎 3 🞎 4 🞎 5 |
| 2 | Representativeness | 🞎 1 🞎 2 🞎 3 🞎 4 🞎 5 |
| 3 | Specificity | 🞎 1 🞎 2 🞎 3 🞎 4 🞎 5 |
| 4 | Clarity | 🞎 1 🞎 2 🞎 3 🞎 4 🞎 5 |

N.B. The experts were briefly informed about the study and the questionnaire &observation scale were also provided.

**Appendix E.** Factors considered for observation scale

| **No.** | **Indicator** | **Please rate (out of 5) teachers based on the indicators during online class** |
| --- | --- | --- |
| 1 | Proficiency with online teaching-learning tools | 🞎 1 🞎 2 🞎 3 🞎 4 🞎 5 |
| 2 | Proficiency in online instructional planning | 🞎 1 🞎 2 🞎 3 🞎 4 🞎 5 |
| 3 | Time management | 🞎 1 🞎 2 🞎 3 🞎 4 🞎 5 |
| 4 | Self-confidence | 🞎 1 🞎 2 🞎 3 🞎 4 🞎 5 |
| 5 | Presentation style | 🞎 1 🞎 2 🞎 3 🞎 4 🞎 5 |
| 6 | Student engagement | 🞎 1 🞎 2 🞎 3 🞎 4 🞎 5 |
| 7 | Maintaining discipline | 🞎 1 🞎 2 🞎 3 🞎 4 🞎 5 |
